# Supplementary material
Source: Springer Nature journal article supplement (https://www.springermedizin.de/resource/supplementary/12885_2002_60_MOESM1_ESM.pdf/9468860)
Supplement: MOESM1 [file 9468860]

**Additional Table 1.** SYBR Green qRT-PCR relative expression measurements for four candidate biomarker transcripts. Each row represents comparison of pre- and post-treatment RNA samples from a single patient. Results are segregated by trial and which treatment each patient received. The relative expression values in this table were used in the analyses described in the text, and this dataset is depicted in hierarchically clustered format (after log transformation) in Figure 4.

| <b>Trial</b> | <b>Arm</b> | <b>MMP9</b> | <b>CD24</b> | <b>lactoferrin</b> | <b>LCN2</b> |
|--------------|------------|-------------|-------------|--------------------|-------------|
| A            | SU5416     | 0.33        | 1.5         | 1.46               | 1.48        |
| A            | SU5416     | 24.76       | 773.4       | 28.8               | 731.65      |
| A            | SU5416     | 0.7         | 1.76        | 8.4                | 7.73        |
| A            | SU5416     | 2.2         | 3           | 13.9               | 9.06        |
| A            | SU5416     | 0.87        | 4.3         | 7.67               | 4.81        |
| A            | SU5416     | 34.9        | 25.72       | 143.01             | 105.05      |
| A            | SU5416     | 2.91        | 3.53        | 1.53               | 5.68        |
| A            | SU5416     | 0.646       | 5.78        | 2.54               | 2.63        |
| A            | SU5416     | 0.42        | 0.7         | 0.3                | 0.39        |
| A            | SU5416     | 1.04        | 5.02        | 3.01               | 2.70        |
| A            | SU5416     | 4.26        | 22.1        | 30.8               | 26.91       |
| A            | SU5416     | 10.34       | 13.69       | 13.9               | 6.30        |
| A            | SU5416     | 7.65        | 4.14        | 29.04              | 24.08       |
| A            | SU5416     | 0.983       | 0.47        | 1.09               | 2.36        |
| A            | SU5416     | 1.92        | 8.91        | 10.2               | 10.85       |
| A            | SU5416     | 2.98        | 5.92        | 9.38               | 10.13       |
| A            | SU5416     | 1.44        | 2.67        | 6.94               | 6.75        |
| A            | SU5416     | 31.67       | 163.14      | 72.25              | 43.26       |
| A            | Control    | 1.55        | 1.36        | 1.57               | 1.29        |
| A            | Control    | 0.66        | 0.48        | 3.6                | 8.52        |
| A            | Control    | 1.01        | 1.03        | 1.04               | 0.92        |
| A            | Control    | 0.7         | 0.55        | 1.3                | 1.04        |
| A            | Control    | 2.085       | 3.78        | 1.04               | 1.03        |
| A            | Control    | 2.59        | 2.68        | 11                 | 6.66        |
| A            | Control    | 0.78        | 0.61        | 1.88               | 2.02        |
| A            | Control    | 1.26        | 1.92        | 1.07               | 1.40        |
| A            | Control    | 0.194       | 0.551       | 1.42               | 1.95        |
| A            | Control    | 2.89        | 18.32       | 13.8               | 12.95       |
| A            | Control    | 0.31        | 0.17        | 2.44               | 2.32        |
| A            | Control    | 3           | 1.53        | 0.24               | 0.64        |
| A            | Control    | 0.32        | 4.1         | 1.3                | 4.48        |
| B            | SU5416     | 9.42        | 7.39        | 9.82               | 1.92        |
| B            | SU5416     | 9.55        | 23.83       | 41.64              | 16.51       |
| B            | SU5416     | 1.67        | 4.94        | 6.19               | 3.18        |
| B            | SU5416     | 1.53        | 4.87        | 13.50              | 3.22        |
| B            | SU5416     | 0.43        | 2.89        | 4.42               | 3.77        |
| B            | SU5416     | 2.73        | 22.47       | 29.55              | 5.19        |
| B            | SU5416     | 0.42        | 1.14        | 2.92               | 0.83        |
| B            | SU5416     | 1.19        | 3.41        | 7.92               | 2.67        |
| B            | SU5416     | 2.92        | 2.53        | 10.41              | 1.29        |
| B            | SU5416     | 2.51        | 2.01        | 3.28               | 1.80        |
| B            | SU5416     | 0.97        | 2.11        | 12.73              | 2.41        |
| B            | SU5416     | 3.13        | 3.23        | 5.26               | 2.03        |
| B            | SU5416     | 2.58        | 0.77        | 0.42               | 0.87        |
| B            | SU5416     | 3.13        | 3.23        | 5.26               | 2.03        |
| B            | SU5416     | 2.58        | 0.77        | 0.42               | 0.87        |
| B            | SU5416     | 5.74        | 19.90       | 23.59              | 17.21       |
| B            | SU5416     | 3.41        | 0.83        | 4.01               | 1.35        |
| B            | SU5416     | 1.13        | 5.17        | 6.06               | 1.77        |
| B            | Control    | 0.39        | 2.17        | 0.80               | 2.89        |
| B            | Control    | 1.16        | 1.05        | 0.92               | 1.19        |
| B            | Control    | 0.35        | 0.42        | 2.08               | 1.05        |
| B            | Control    | 2.07        | 1.65        | 1.91               | 0.95        |
| B            | Control    | 1.31        | 1.08        | 6.13               | 0.91        |
| B            | Control    | 2.97        | 3.32        | 4.52               | 1.82        |
| B            | Control    | 0.37        | 1.03        | 1.19               | 0.77        |
| B            | Control    | 0.46        | 0.74        | 1.46               | 1.13        |
| B            | Control    | 0.05        | 0.43        | 0.77               | 1.02        |
| B            | Control    | 2.54        | 1.49        | 1.65               | 1.18        |
| B            | Control    | 1.27        | 0.11        | 0.42               | 0.75        |
| B            | Control    | 2.54        | 1.49        | 1.65               | 1.18        |
| B            | Control    | 0.71        | 0.87        | 0.51               | 0.30        |
| B            | Control    | 1.09        | 0.96        | 0.44               | 1.21        |
| B            | Control    | 1.09        | 8.60        | 5.66               | 7.49        |
| B            | Control    | 31.89       | 0.60        | 2.17               | 1.01        |
| B            | Control    | 1.30        | 0.20        | 0.39               | 1.62        |
| B            | Control    | 0.07        | 1.40        | 1.20               | 1.09        |
